# Supplementary material
Source: MDPI journal article supplement (https://www.mdpi.com/2073-4395/12/9/2155)
Supplement: s1 [file s1]

Table S1. Monthly average temperature, relative humidity, dew point, precipitation and wind speed in 2019 and 2020 growing seasons.

| Month                    | Temperature<br>(°C) | Humidity<br>(%) | Dew Point<br>(°C) | Precipitation<br>(mm) | Wind Speed<br>(km/h) |
|--------------------------|---------------------|-----------------|-------------------|-----------------------|----------------------|
| <b>First season 2019</b> |                     |                 |                   |                       |                      |
| May                      | 27.4                | 38.1            | 9.50              | 0.0                   | 15.5                 |
| June                     | 29.6                | 56.7            | 16.9              | 0.0                   | 19.9                 |
| July                     | 30.3                | 52.7            | 18.6              | 0.0                   | 18.9                 |
| August                   | 30.3                | 54.0            | 18.8              | 0.0                   | 11.9                 |
| September                | 27.9                | 57.9            | 18.3              | 0.0                   | 13.3                 |
| October                  | 25.9                | 59.1            | 16.5              | 0.0                   | 12.4                 |
| <b>Secon season 2020</b> |                     |                 |                   |                       |                      |
| May                      | 26.2                | 42.1            | 10.1              | 0.0                   | 18.1                 |
| June                     | 27.9                | 44.5            | 13.0              | 0.0                   | 20.6                 |
| July                     | 29.2                | 55.8            | 18.5              | 0.0                   | 15.1                 |
| August                   | 29.7                | 55.7            | 19.0              | 0.0                   | 13.8                 |
| September                | 29.3                | 59.6            | 19.5              | 0.0                   | 18.0                 |
| October                  | 26.0                | 59.1            | 16.9              | 0.0                   | 15.4                 |
